# Supplementary material for: Reversible formation of supramolecular polymer networks via orthogonal pillar[10]arene-based host–guest interactions and metal ion coordinations
Source: Royal Society of Chemistry journal article supplement (doi:10.1039/c5dt04237b), 2015-01-01
Supplement: c5dt04237b1.pdf [file c5dt04237b1.pdf]

# Reversible formation of supramolecular polymer networks via orthogonal pillar[10]arene-based host–guest interactions and metal ion coordinations

Lintao Wu<sup>1</sup>, Chun Han<sup>1</sup>, Xi Wu<sup>1</sup>, Lei Wang<sup>2</sup>, Yaozi Caochen<sup>2</sup>, Xiaobi Jing<sup>2\*</sup>

<sup>1</sup>Department of Chemistry, Changzhi University, Changzhi, Shanxi, 046011 (China).

<sup>2</sup>College of Chemistry and Chemical Engineering, Yangzhou University, Yangzhou, Jiangsu, 225002 (China).

Email address: xbjing@yzu.edu.cn

## Electronic Supplementary Information (9 pages)

|                                                                            |    |
|----------------------------------------------------------------------------|----|
| 1. <i>Materials and methods</i> .....                                      | S2 |
| 2. <i>Synthesis of ligand 1</i> .....                                      | S3 |
| 3. <i>Synthesis of dimeric complex 3</i> .....                             | S6 |
| 4. <i>Host–guest complexation between 1 and P10</i> .....                  | S7 |
| 5. <i>CF<sub>3</sub>COOH responsive transformation</i> .....               | S8 |
| 6. <i>Competitive host-guest interactions between P10 and 1 or 5</i> ..... | S9 |
| 7. <i>Reference</i> .....                                                  | S9 |

## 1. Materials and methods

All reagents were commercially available and used as supplied without further purification. **P**<sub>10</sub> was prepared according previous relevant reports.<sup>S1</sup> <sup>1</sup>H or <sup>13</sup>C NMR spectra were recorded with a Bruker Avance DMX 500 spectrophotometer or a Bruker Avance DMX 400 spectrophotometer with use of the deuterated solvent as the lock and the residual solvent or TMS as the internal reference. Mass spectra were obtained on a Bruker Esquire 3000 plus mass spectrometer (Bruker-Franzen Analytik GmbH Bremen, Germany) equipped with an ESI interface and an ion trap analyzer. HRMS were obtained on a WATERS GCT Premier mass spectrometer. Viscosity measurements were carried out with a Cannon-Ubbelohde semi-micro dilution viscometer at 25.0 °C in acetonitrile. Scanning electron microscopy investigation was carried out on a JEOL 6390LV instrument. The fluorescence spectra were recorded on a Perkin Elmer LS55 fluorescence spectrophotometer. UV–Vis spectra were taken on a Perkin-Elmer Lambda 35 UV–Vis spectrophotometer.

## 2. Synthesis of ligand 1

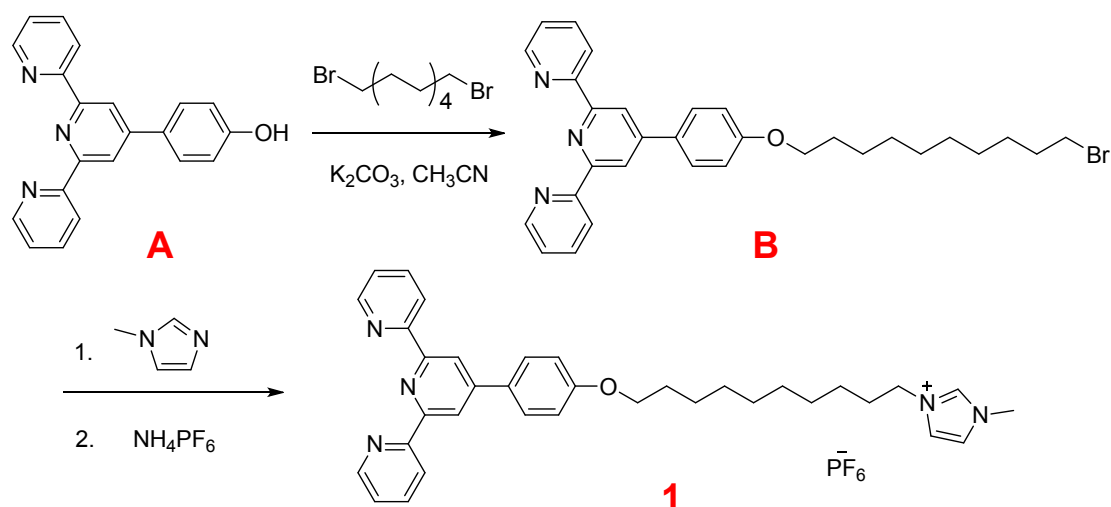

**Scheme S1.** Synthesis route to ligand 1.

In a 500 mL round-bottom flask, compound **A** (3.25 g, 10.0 mmol), K<sub>2</sub>CO<sub>3</sub> (3.31 g, 24.0 mmol), 1,10-dibromodecane (5.40 g, 18.0 mmol) and acetonitrile (300 mL) were added. The reaction mixture was stirred at reflux for 48 hours. After the solid was filtered off, the solvent was removed. The solid was dissolved in CHCl<sub>3</sub> (200 mL) and washed twice with H<sub>2</sub>O (200 mL). The organic layer was dried over anhydrous Na<sub>2</sub>SO<sub>4</sub> and evaporated to afford the crude product, which was recrystallized with CH<sub>3</sub>CN to give the intermediate **B** as a white solid (4.35 g, 80.0 %) as a white solid. The proton NMR spectrum of **B** is shown in Fig. S1. <sup>1</sup>H NMR (400 MHz, CDCl<sub>3</sub>, 298K) δ (ppm): 8.73-8.66 (m, 6H), 7.88-7.86 (t, *J* = 4 Hz, 4H), 7.36-7.33 (m, 2H), 7.03-7.01 (d, *J* = 8 Hz, 2H), 4.04-4.01 (d, *J* = 12 Hz, 2H), 3.43-3.40 (d, *J* = 12 Hz, 2H), 1.90-1.79 (m, 4H), 1.59-1.33 (m, 12H).

In a 50 mL round-bottom flask, compound **B** (1.09 g, 2.0 mmol), methylimidazole (0.82 g, 10.0 mmol), and toluene (20 mL) were added. The reaction mixture was stirred at reflux for 24 hours. Then the solvent was removed. The solid was dissolved in water (20 mL). Then upon addition of aqueous solution of NH<sub>4</sub>PF<sub>6</sub>, a white precipitate **1** (1.24g, 90%) was prepared. The proton NMR spectrum of **1** is shown in Fig. S2. <sup>1</sup>H NMR (400 MHz, CD<sub>3</sub>CN, 298K) δ (ppm): 8.72-8.64 (m, 6H), 8.34 (s, 1H), 7.98-7.89 (m, 2H), 7.84 (s, 2H), 7.45-7.42 (t, *J* = 4 Hz, 2H), 7.34-7.31 (d, *J* = 8 Hz, 2H), 7.15-7.12 (t, *J* = 6 Hz, 2H), 7.06 (s, 1H), 7.04 (s, 2H), 4.09-4.03 (m,

4H), 4.00 (s, 3H), 1.94-1.75 (m, 4H), 1.47-1.43 (m, 2H), 1.31 (s, 12H). The  $^{13}\text{C}$  NMR spectrum of **1** is shown in Fig. S3. The  $^{13}\text{C}$  NMR (100 MHz,  $\text{CD}_3\text{CN}$ , 298K)  $\delta$  (ppm): 160.12, 156.43, 155.83, 149.11, 136.86, 128.50, 123.76, 121.39, 118.26, 114.87, 68.12, 34.06, 32.84, 29.45, 29.37, 29.26, 28.76, 28.18, 26.04. LRESIMS is shown in Fig. S4:  $m/z$  546.7 [**1** -  $\text{PF}_6$ ] $^+$ . HRESIMS:  $m/z$  calcd for [**1** -  $\text{PF}_6$ ] $^+$   $\text{C}_{35}\text{H}_{40}\text{N}_5\text{O}$ , 546.3200; found, 546.3200; error 0 ppm.

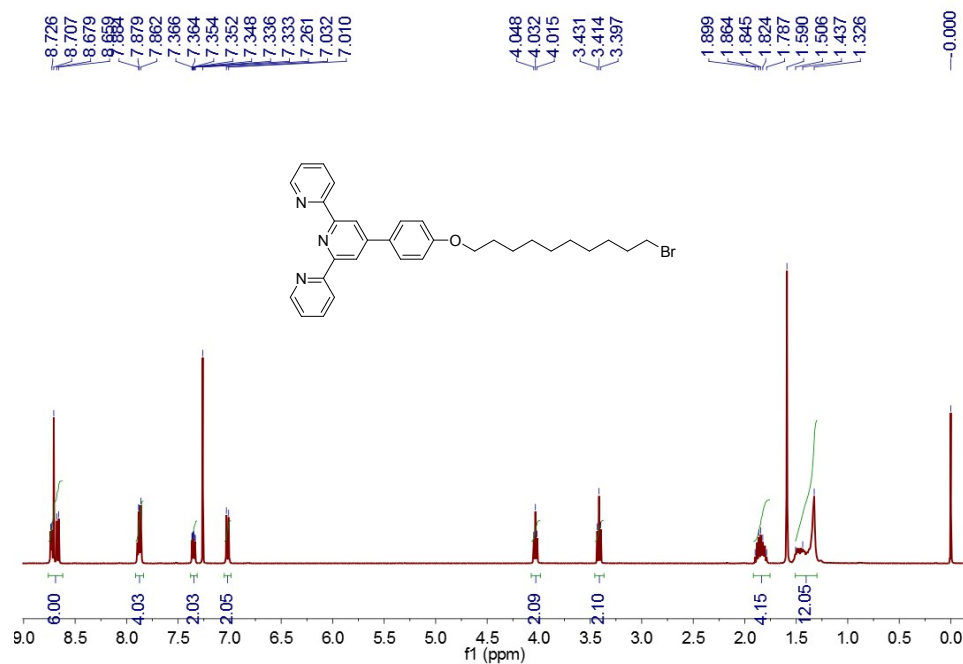

**Fig. S1**  $^1\text{H}$  NMR spectrum (400 MHz,  $\text{CDCl}_3$ , 298K) of **B**.

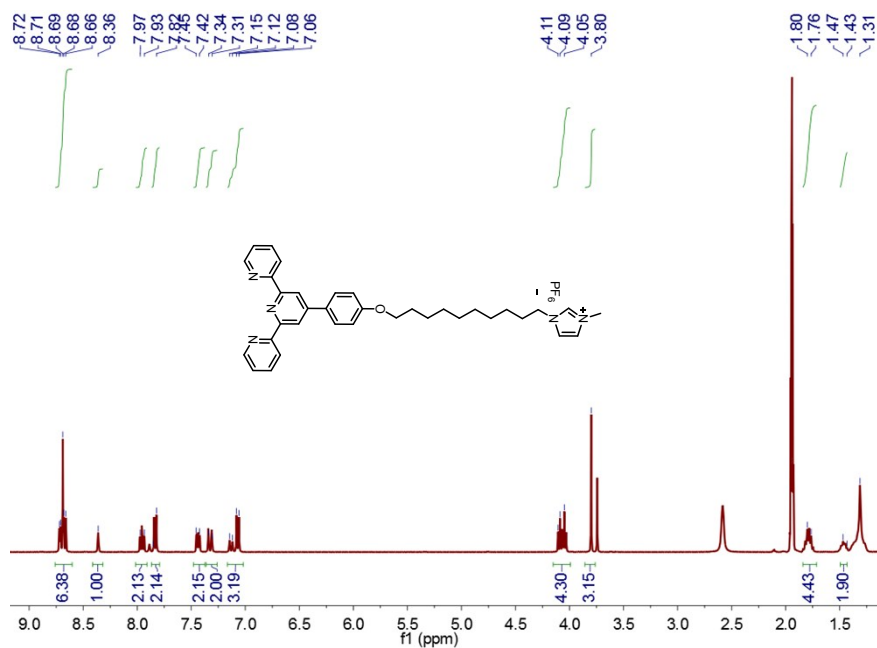

**Fig. S2**  $^1\text{H}$  NMR spectrum (400 MHz,  $\text{CD}_3\text{CN}$ , 298K) of ligand **1**.

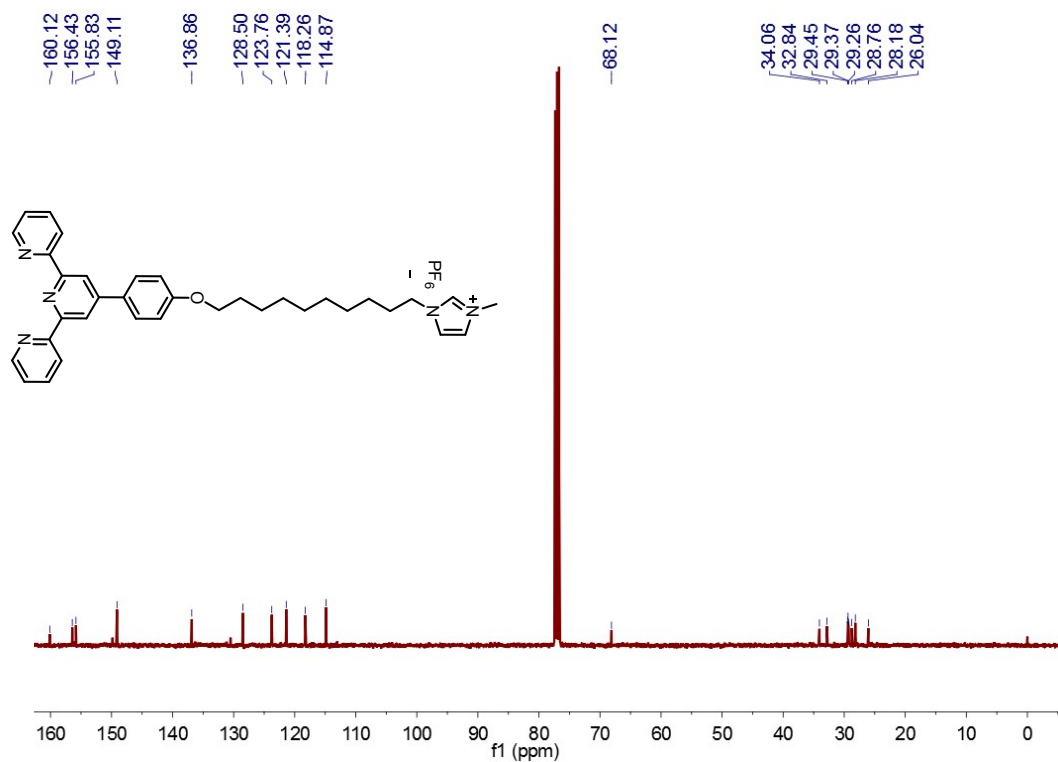

**Fig. S3**  $^{13}\text{C}$  NMR spectrum (100 MHz,  $\text{CD}_3\text{CN}$ , 298K) of ligand **1**.

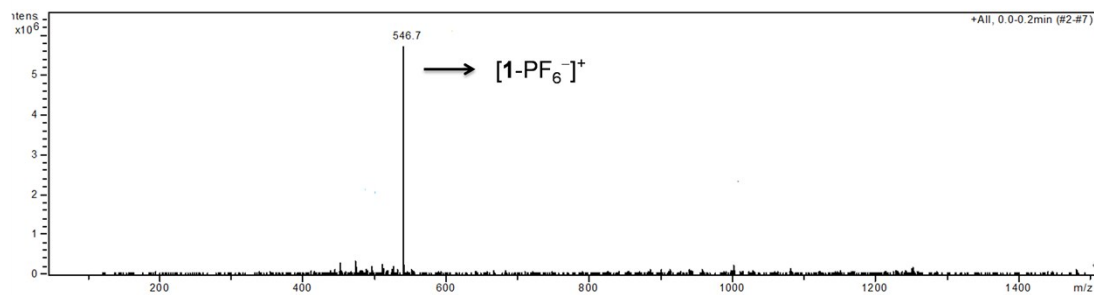

**Fig. S4** Electrospray ionization mass spectrum of ligand **1**. Assignment of the main peak:  $m/z$  546.7  $[1-\text{PF}_6]^+$ .

### 3. Synthesis of dimeric complex 3

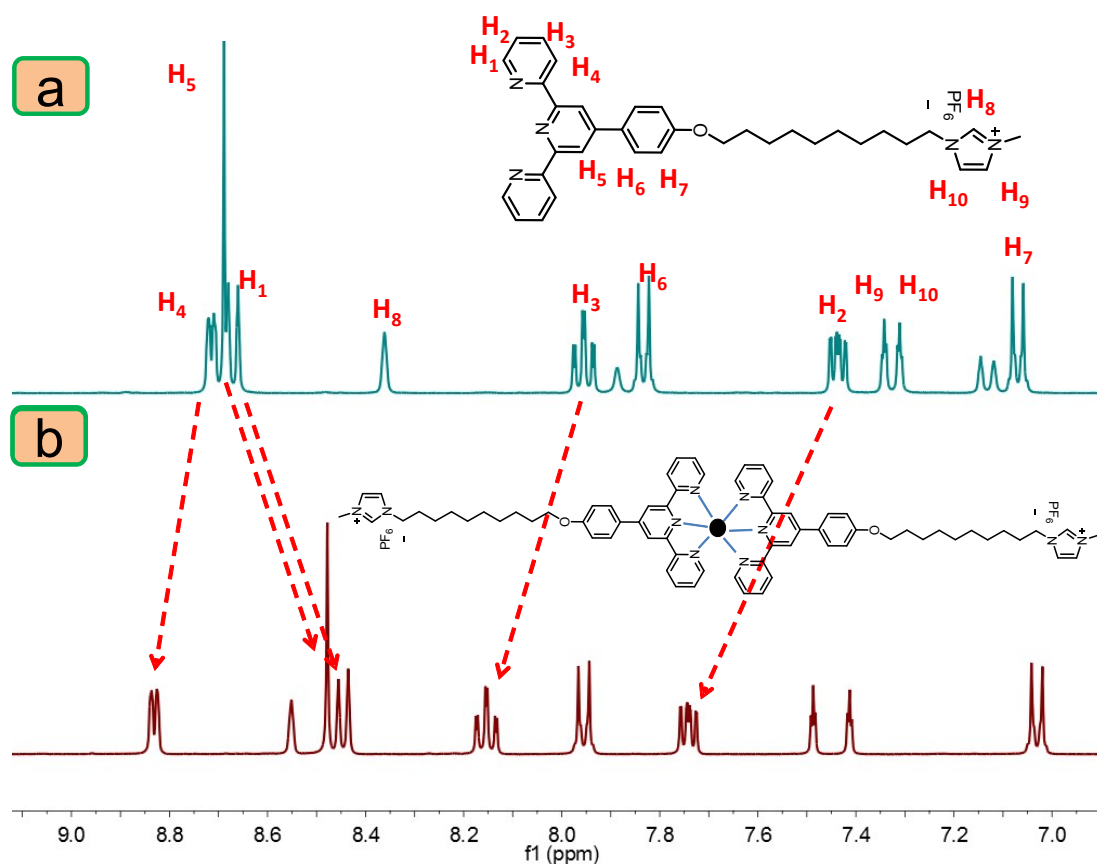

**Fig. S5** partial  $^1\text{H}$  NMR spectrum (400 MHz,  $\text{CD}_3\text{CN}$ , 25  $^\circ\text{C}$ ) of (a) ligand **1** and (b) dimeric complex **3**.

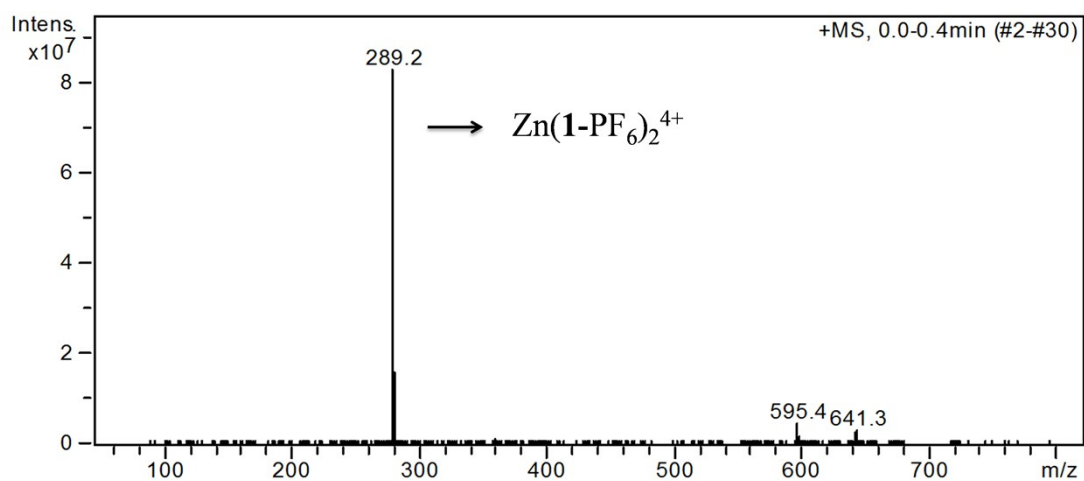

**Fig. S6** Electrospray ionization mass spectrum of dimeric complex **3**. Assignment of the main peak:  $m/z$  289.2  $[\text{Zn}(\mathbf{1} - \text{PF}_6)_2]^{4+}$ .

#### 4. Host-guest complexation between **1** and **P<sub>10</sub>**

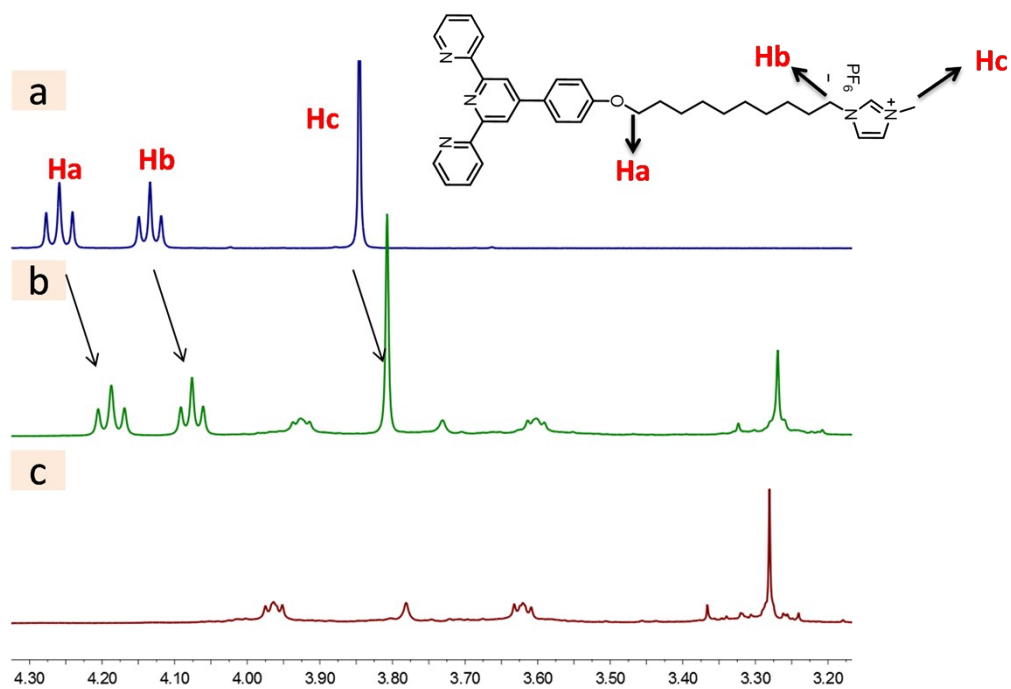

**Fig. S7** partial <sup>1</sup>H NMR spectrum (400 MHz, CD<sub>3</sub>CN, 25 °C) of (a) ligand **1**, (b) **P<sub>10</sub>** and ligand **1**, (c) **P<sub>10</sub>**.

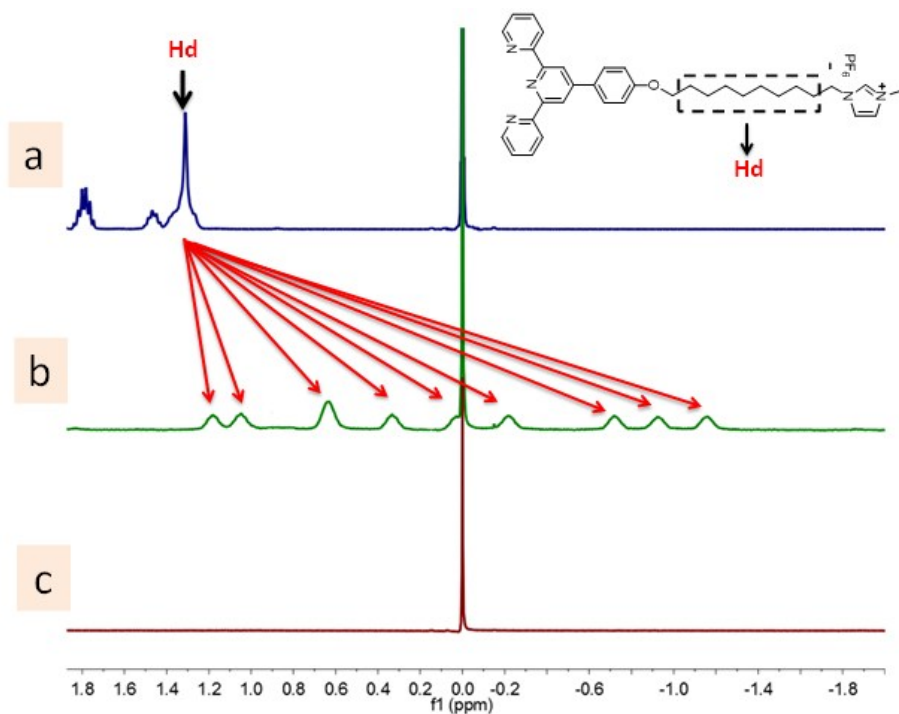

**Fig. S8** partial <sup>1</sup>H NMR spectrum (400 MHz, CD<sub>3</sub>CN, 25 °C) of (a) ligand **1**, (b) **P<sub>10</sub>** and ligand **1**, (c) **P<sub>10</sub>**.

## 5. CF<sub>3</sub>COOH responsive transformation

As shown in Fig. S9, the signal of imidazolium proton H<sub>8</sub> disappeared, indicating the formation of carbene-Ag complex. More interestingly, the signal of H<sub>8</sub> reappeared by adding CF<sub>3</sub>COOH, which is attributed to the stronger binding ability between Ag<sup>+</sup> and CF<sub>3</sub>COOH. However, when we added NaOH into the solution of linear supramolecular polymer **A**, the signal of H<sub>8</sub> remained the same, suggesting that the complexation was not simply pH-reponsive.

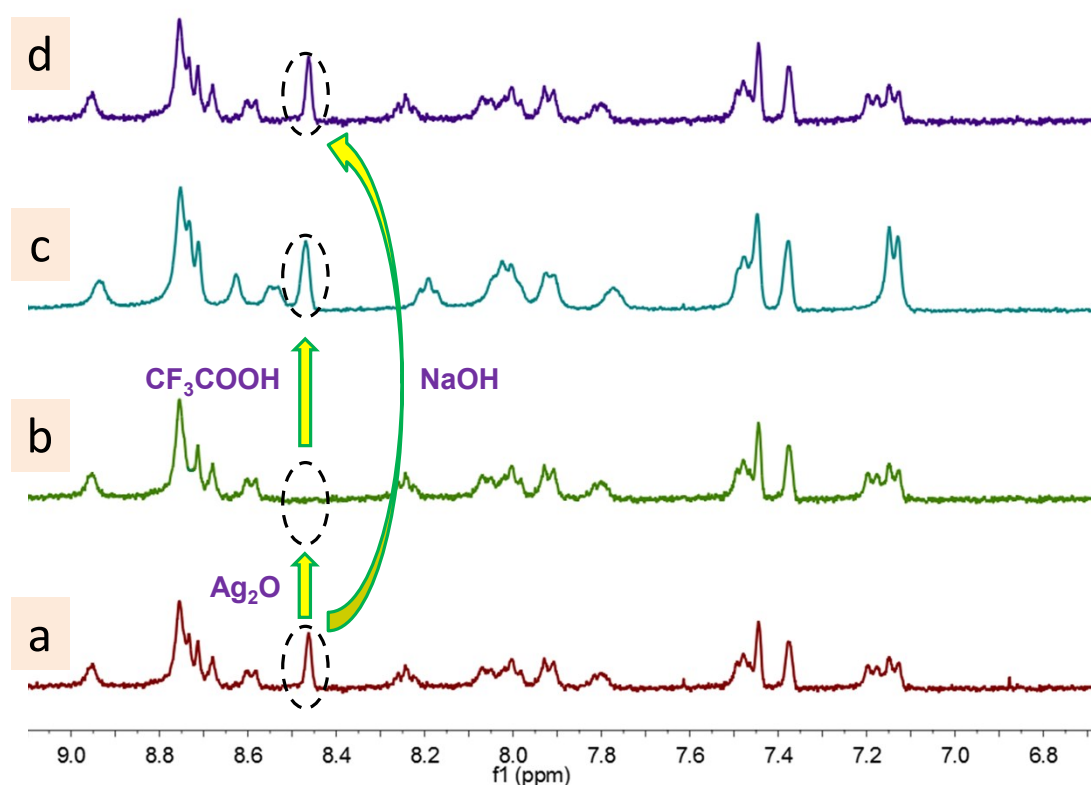

**Fig. S9** Partial <sup>1</sup>H NMR spectra (400 MHz, CD<sub>3</sub>CN, 25 °C): (a) linear supramolecular polymer **A**; (b) linear supramolecular polymer **A** and excess Ag<sub>2</sub>O; (c) after addition of excess CF<sub>3</sub>COOH to (b); (d) after addition of excess NaOH to (a).



## 6. Competitive host-guest interactions between P10 and 1 or 5

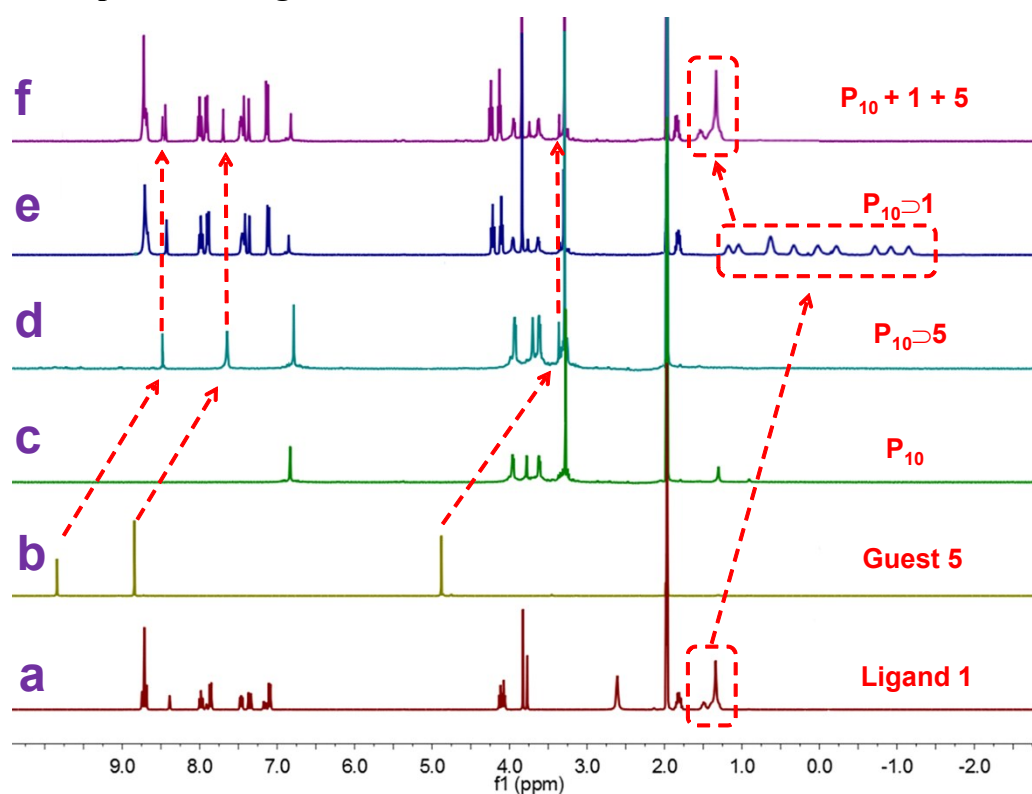

**Fig. S10** Partial <sup>1</sup>H NMR spectra (400 MHz, CD<sub>3</sub>CN, 25 °C): (a) ligand **1**; (b) guest **5**; (c) P<sub>10</sub>; (d) P<sub>10</sub>⊃**5**; (e) P<sub>10</sub>⊃**1**; (f) P<sub>10</sub> + **1** + **5**.

## 7. References

- S1. (a) T. Ogoshi, T. Aoki, R. Shiga, R. Iizuka, S. Ueda, K. Demachi, D. Yamafuji, H. Kayama, and T.-a. Yamagishi, *J. Am. Chem. Soc.*, 2012, **134**, 20322–20325; (b) X. Chi, and M. Xue, *RSC Adv.*, 2014, **4**, 365–368; (c) G. Yu, J. Zhou, and X. Chi, *Macromol. Rapid Commun.*, 2015, **36**, 23–30.
